# Supplementary material for: Thermophilic Enterococcus faecium QU 50 enabled open repeated batch fermentation for l-lactic acid production from mixed sugars without carbon catabolite repression
Source: Royal Society of Chemistry journal article supplement (doi:10.1039/c7ra03176a), 2017-01-01
Supplement: c7ra03176a1.pdf [file c7ra03176a1.pdf]

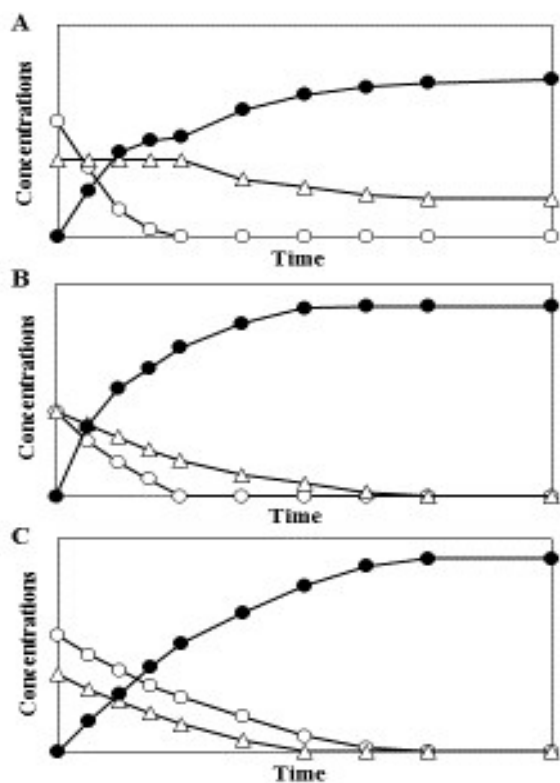

Fig. S1

**Fig. S1** Profile of the utilisations of sugar mixtures containing preferred sugar (e.g. glucose) and non-favourable sugar (e.g. xylose) in fermentations.<sup>11</sup> Significant CCR (A), relaxed CCR (B), and no CCR (C). Symbols: open circles, preferred sugar concentration; closed circles, product concentration; open triangles, non-favourable sugar concentration.
